# Supplementary material for: Booster or Stumbling Block? The Role of Environmental Regulation in the Coupling Path of Regional Innovation under the Porter Hypothesis
Source: MDPI journal article supplement (doi:10.3390/su14052876), 2022-03-01
Supplement: s1 [file s1]

Supplementary Materials:

# Booster or Stumbling Block? The Role of Environmental Regulation in the Coupling Path of Regional Innovation under the Porter Hypothesis

Xin Nie, Jianxian Wu, Han Wang, Lihua Li, Chengdao Huang, Weijuan Li and Zhuxia Wei \*

\* Correspondence: jingshilw@163.com

**Table S1.** Coupling path to enhance regional innovation (Calibration point reduced by 5%)

|                     | Solutions |       |       |       |       |       |       |       |       |       |       |       |
|---------------------|-----------|-------|-------|-------|-------|-------|-------|-------|-------|-------|-------|-------|
|                     | 1         | 2     | 3     | 4     | 5     | 6     | 7     | 8     | 9     | 10    | 11    | 12    |
| ER                  | ⊗         |       |       | ●     | ●     | ●     |       | ⊗     | ●     | ●     | ●     | ●     |
| FDI                 | ●         | ●     | ●     | ●     | ●     | ●     | ●     | ●     | ●     | ●     |       | ⊗     |
| GSTE                |           | ●     | ●     | ●     | ●     | ●     | ●     | ●     |       |       | ●     | ●     |
| VATI                |           |       | ●     | ●     | ●     | ●     | ●     | ●     | ●     | ●     | ●     | ●     |
| ML                  | ●         | ●     | ●     | ●     | ●     |       | ●     | ⊗     | ●     | ⊗     | ⊗     | ●     |
| HC                  | ⊗         | ⊗     | ●     | ●     | ●     | ●     | ●     | ●     | ●     | ●     | ●     | ⊗     |
| IL                  | ⊗         | ⊗     | ⊗     | ●     |       | ●     |       | ●     | ⊗     | ●     | ●     | ●     |
| TCT                 | ●         | ●     | ●     |       |       |       | ●     |       | ●     | ●     | ●     | ●     |
| PGDP                | ●         | ●     |       |       | ●     | ●     | ●     | ⊗     | ⊗     | ⊗     | ⊗     | ●     |
| Raw coverage        | 0.092     | 0.111 | 0.298 | 0.409 | 0.469 | 0.409 | 0.545 | 0.081 | 0.091 | 0.102 | 0.108 | 0.049 |
| Unique coverage     | 0.014     | 0.012 | 0.003 | 0.023 | 0.016 | 0.023 | 0.018 | 0.010 | 0.007 | 0.003 | 0.012 | 0.008 |
| Consistency         | 0.956     | 0.978 | 0.998 | 0.994 | 0.999 | 0.996 | 0.999 | 0.945 | 0.977 | 0.982 | 0.978 | 0.990 |
| Overall consistency | 0.979     |       |       |       |       |       |       |       |       |       |       |       |
| Overall coverage    | 0.754     |       |       |       |       |       |       |       |       |       |       |       |

Notes: 1. ● indicates the presence of a core condition; i.e., the higher the strength of this variable, the stronger its contribution to the results. 2. ⊗ indicates that a condition is peripheral, implying that a lower strength of this variable, leads to a stronger contribution to the outcome. 3. ● indicates the presence of a periphery condition, meaning that the higher the strength of this variable, the stronger the contribution to the outcome; however, this contribution is lower than the contribution from the presence of the core condition (●). 4. ⊗ denotes the absence of the periphery condition, meaning that the lower the strength of this variable, the stronger the contribution to the outcome; however, this contribution is lower than the contribution from the absence of the core condition (⊗). Blank spaces indicate “irrelevant.”

**Table S2.** Reducing paths to enhance regional innovation (Calibration point reduced by 5%)

|                     | Solutions |       |       |       |       |       |       |       |       |       |       |
|---------------------|-----------|-------|-------|-------|-------|-------|-------|-------|-------|-------|-------|
|                     | 1         | 2     | 3     | 4     | 5     | 6     | 7     | 8     | 9     | 10    | 11    |
| ER                  |           | ⊗     | ⊗     |       | ⊗     | ●     | ⊗     | ⊗     | ●     | ●     | ●     |
| FDI                 | ⊗         | ⊗     | ⊗     | ⊗     | ⊗     | ⊗     | ⊗     | ●     | ●     | ⊗     | ●     |
| GSTE                | ⊗         | ⊗     | ⊗     | ⊗     | ⊗     |       | ⊗     | ⊗     | ⊗     | ⊗     | ⊗     |
| VATI                | ⊗         | ⊗     | ⊗     | ⊗     | ⊗     |       | ⊗     | ⊗     | ⊗     | ⊗     | ⊗     |
| ML                  | ⊗         |       | ⊗     | ⊗     | ⊗     | ⊗     | ●     | ⊗     | ●     | ●     | ●     |
| HC                  | ⊗         | ⊗     | ⊗     | ⊗     | ⊗     | ⊗     | ⊗     | ●     | ⊗     | ●     | ⊗     |
| IL                  |           | ⊗     | ⊗     | ●     | ●     | ●     | ⊗     |       | ⊗     | ●     | ⊗     |
| TCT                 | ⊗         | ⊗     |       |       |       | ⊗     |       | ⊗     | ⊗     | ⊗     | ●     |
| PGDP                |           |       |       | ⊗     |       | ●     | ⊗     | ⊗     | ⊗     | ⊗     | ●     |
| Raw coverage        | 0.536     | 0.296 | 0.307 | 0.312 | 0.285 | 0.112 | 0.103 | 0.086 | 0.054 | 0.088 | 0.052 |
| Unique coverage     | 0.060     | 0.019 | 0.007 | 0.015 | 0.011 | 0.039 | 0.013 | 0.015 | 0.010 | 0.023 | 0.018 |
| Consistency         | 0.999     | 0.996 | 0.997 | 0.987 | 0.991 | 0.962 | 0.983 | 0.973 | 0.994 | 0.983 | 0.951 |
| Overall consistency |           |       |       |       |       | 0.979 |       |       |       |       |       |
| Overall coverage    |           |       |       |       |       | 0.769 |       |       |       |       |       |

Notes: 1. ● indicates the presence of a core condition; i.e., the higher the strength of this variable, the stronger its contribution to the results. 2. ⊗ indicates that a condition is peripheral, implying that a lower strength of this variable, leads to a stronger contribution to the outcome. 3. ● indicates the presence of a periphery condition, meaning that the higher the strength of this variable, the stronger the contribution to the outcome; however, this contribution is lower than the contribution from the presence of the core condition (●). 4. ⊗ denotes the absence of the periphery condition, meaning that the lower the strength of this variable, the stronger the contribution to the outcome; however, this contribution is lower than the contribution from the absence of the core condition (⊗). Blank spaces indicate “irrelevant.”

**Table S3.** Coupling path to enhance regional innovation (Calibration point up 5%)

|                     | Solutions |       |       |       |       |       |       |       |       |       |       |       |
|---------------------|-----------|-------|-------|-------|-------|-------|-------|-------|-------|-------|-------|-------|
|                     | 1         | 2     | 3     | 4     | 5     | 6     | 7     | 8     | 9     | 10    | 11    | 12    |
| ER                  |           |       | ●     | ●     | ●     |       | ⊗     | ●     | ●     | ●     | ●     | ●     |
| FDI                 | ●         | ●     | ●     | ●     | ●     | ●     | ●     | ●     | ●     |       | ●     | ⊗     |
| GSTE                | ●         | ●     | ●     | ●     | ●     | ●     | ●     |       |       | ●     | ●     | ●     |
| VATI                | ●         | ●     | ●     | ●     | ●     | ●     | ●     | ●     | ●     | ●     |       | ●     |
| ML                  | ●         | ●     | ●     | ●     |       | ●     | ⊗     | ●     | ⊗     | ⊗     | ●     | ●     |
| HC                  | ●         |       | ●     | ●     | ●     | ●     | ●     | ●     | ●     | ●     | ⊗     | ⊗     |
| IL                  | ⊗         | ⊗     | ●     |       | ●     |       | ●     | ⊗     | ●     | ●     | ⊗     | ●     |
| TCT                 | ●         | ●     |       |       |       | ●     |       | ●     | ●     | ●     | ●     | ●     |
| PGDP                |           | ●     |       | ●     | ●     | ●     | ⊗     | ●     | ⊗     | ⊗     | ●     | ●     |
| Raw coverage        | 0.305     | 0.323 | 0.338 | 0.420 | 0.337 | 0.502 | 0.083 | 0.092 | 0.095 | 0.110 | 0.084 | 0.040 |
| Unique coverage     | 0.005     | 0.027 | 0.023 | 0.020 | 0.021 | 0.016 | 0.014 | 0.008 | 0.003 | 0.016 | 0.005 | 0.008 |
| Consistency         | 0.997     | 0.998 | 0.995 | 0.999 | 0.997 | 0.999 | 0.939 | 0.977 | 0.986 | 0.976 | 0.971 | 0.995 |
| Overall consistency |           |       |       |       |       | 0.982 |       |       |       |       |       |       |
| Overall coverage    |           |       |       |       |       | 0.733 |       |       |       |       |       |       |

Notes: 1. ● indicates the presence of a core condition; i.e., the higher the strength of this variable, the stronger its contribution to the results. 2. ⊗ indicates that a condition is peripheral, implying that a lower strength of this variable, leads to a stronger contribution to the outcome. 3. ● indicates the presence of a periphery condition, meaning that the higher the strength of this variable, the stronger the contribution to the outcome; however, this contribution is lower than the contribution from the presence of the core condition (●). 4. ⊗ denotes the absence of the periphery condition, meaning that the lower the strength of this variable, the stronger

the contribution to the outcome; however, this contribution is lower than the contribution from the absence of the core condition (⊗). Blank spaces indicate “irrelevant.”

**Table S4.** Reducing paths to enhance regional innovation (Calibration point up 5%).

|                     | Solutions |       |       |       |       |       |       |       |       |       |       |
|---------------------|-----------|-------|-------|-------|-------|-------|-------|-------|-------|-------|-------|
|                     | 1         | 2     | 3     | 4     | 5     | 6     | 7     | 8     | 9     | 10    | 11    |
| ER                  |           | ⊗     | ⊗     |       | ⊗     | ●     | ⊗     | ⊗     | ●     | ●     | ●     |
| FDI                 | ⊗         | ⊗     | ⊗     | ⊗     | ⊗     | ⊗     | ⊗     | ●     | ●     | ⊗     | ●     |
| GSTE                | ⊗         | ⊗     | ⊗     | ⊗     | ⊗     |       | ⊗     | ⊗     | ⊗     | ⊗     | ⊗     |
| VATI                | ⊗         | ⊗     | ⊗     | ⊗     | ⊗     |       | ⊗     | ⊗     | ⊗     | ⊗     | ⊗     |
| ML                  | ⊗         |       |       | ⊗     | ⊗     | ⊗     | ●     | ⊗     | ●     | ●     | ●     |
| HC                  | ⊗         |       | ⊗     | ⊗     | ⊗     | ⊗     | ⊗     | ●     | ⊗     | ●     | ⊗     |
| IL                  |           | ⊗     | ⊗     | ●     | ●     | ●     | ⊗     |       | ⊗     | ●     | ⊗     |
| TCT                 | ⊗         | ⊗     | ⊗     |       |       | ⊗     |       | ⊗     | ⊗     | ⊗     | ●     |
| PGDP                |           | ⊗     |       | ⊗     |       | ●     | ⊗     | ⊗     | ⊗     | ⊗     | ●     |
| Raw coverage        | 0.577     | 0.350 | 0.357 | 0.282 | 0.259 | 0.092 | 0.109 | 0.085 | 0.058 | 0.061 | 0.043 |
| Unique coverage     | 0.063     | 0.023 | 0.007 | 0.011 | 0.009 | 0.030 | 0.011 | 0.011 | 0.011 | 0.016 | 0.012 |
| Consistency         | 0.998     | 0.995 | 0.996 | 0.988 | 0.989 | 0.970 | 0.987 | 0.961 | 0.988 | 0.981 | 0.939 |
| Overall consistency |           |       |       |       |       | 0.983 |       |       |       |       |       |
| Overall coverage    |           |       |       |       |       | 0.776 |       |       |       |       |       |

Notes: 1. ● indicates the presence of a core condition; i.e., the higher the strength of this variable, the stronger its contribution to the results. 2. ⊗ indicates that a condition is peripheral, implying that a lower strength of this variable, leads to a stronger contribution to the outcome. 3. ● indicates the presence of a periphery condition, meaning that the higher the strength of this variable, the stronger the contribution to the outcome; however, this contribution is lower than the contribution from the presence of the core condition (●). 4. ⊗ denotes the absence of the periphery condition, meaning that the lower the strength of this variable, the stronger the contribution to the outcome; however, this contribution is lower than the contribution from the absence of the core condition (⊗). Blank spaces indicate “irrelevant.”
